# Supplementary material for: Phytoremediation Potential of Crop Plants in Countering Nickel Contamination in Carbonation Lime Coming from the Sugar Industry
Source: MDPI journal article supplement (doi:10.3390/plants9050580), 2020-05-02
Supplement: s1 [file s1]

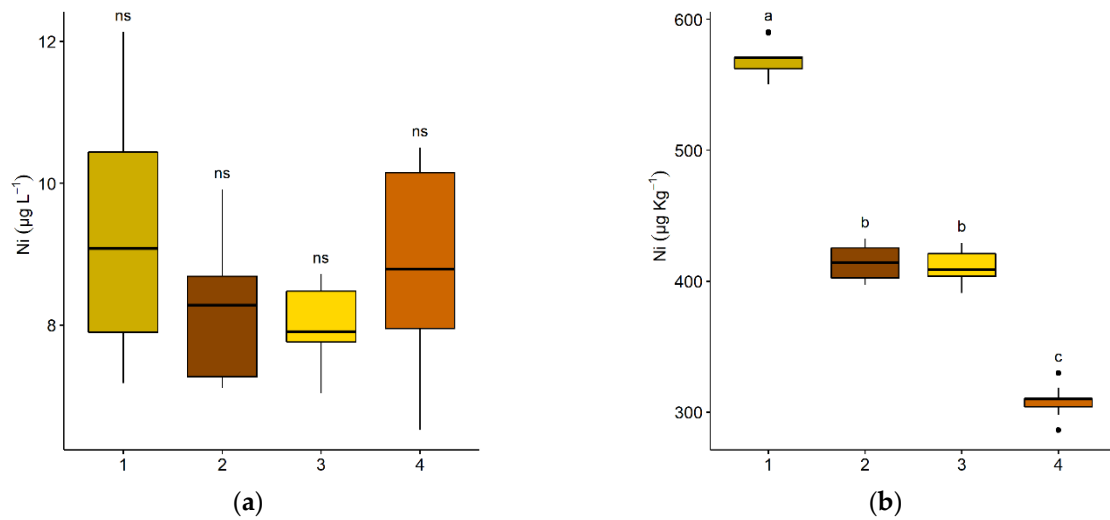

**Figure S1.** (a) Pre-sowing concentration of soluble Ni ( $\mu\text{g L}^{-1}$ ) in lime within boxes 1-4; (b) Pre-sowing concentration of bioavailable Ni ( $\mu\text{g Kg}^{-1}$ ) in lime within boxes 1-4. Number in the x-axis refer to the four boxes. Dunn's Kruskal-Wallis multiple comparisons (Benjamini-Hochberg p-value adjustment,  $\alpha$ -level=0.05).

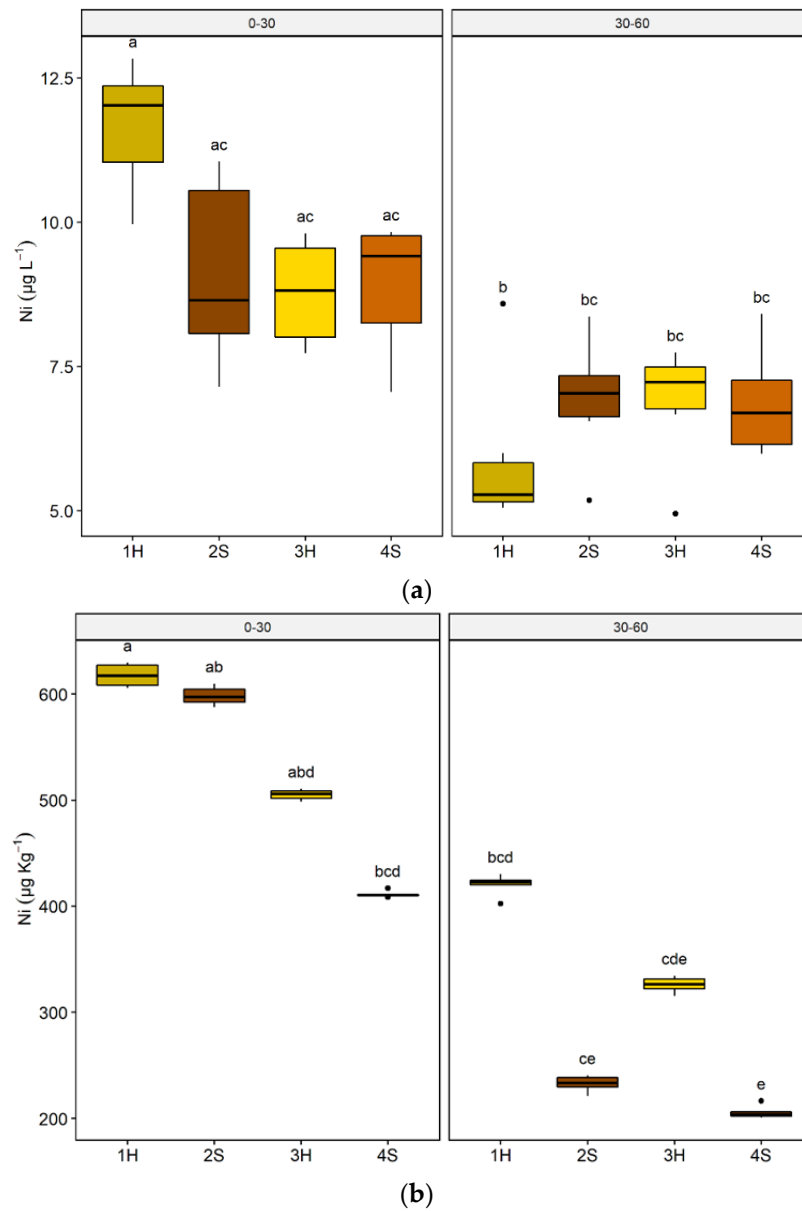

**Figure S2.** (a) Post-harvest concentration of soluble Ni ( $\mu\text{g L}^{-1}$ ) in lime within boxes 1-4. (b) Post-harvest concentration of bioavailable Ni ( $\mu\text{g Kg}^{-1}$ ) in lime within boxes 1-4. Box 1 and 3 after *Helianthus annuus* (1H, 3H); box 2 and 4 after *Sorghum vulgare* (2S, 4S). Ni concentration was grouped by depth of sampling (0-30 cm, 30-60 cm). Dunn's Kruskal-Wallis multiple comparisons (Benjamini-Hochberg p-value adjustment,  $\alpha$ -level=0.05) was performed using data from both sampling depths.

**Table S1.** Dry weight (g) of biomass per plant in the greenhouse experiment (reported values are mean  $\pm$  standard deviation).

| Trial | Hypogeal        | Epigeal          |
|-------|-----------------|------------------|
| B     | 4.52 $\pm$ 0.64 | 15.16 $\pm$ 0.87 |
| B+    | 4.40 $\pm$ 0.81 | 14.71 $\pm$ 1.22 |
| BC    | 4.50 $\pm$ 0.80 | 14.58 $\pm$ 1.07 |
| S     | 0.79 $\pm$ 0.11 | 5.91 $\pm$ 0.39  |
| S+    | 0.37 $\pm$ 0.10 | 4.73 $\pm$ 0.51  |
| SC    | 0.56 $\pm$ 0.14 | 5.97 $\pm$ 0.49  |

**Table S2.** Dry weight (g) of biomass per plant in the outdoor experiment (reported values are mean  $\pm$  standard deviation).

| Box | Root             | Stem             | Leaf             | Infructescence   |
|-----|------------------|------------------|------------------|------------------|
| 1H  | 22.37 $\pm$ 2.38 | 81.16 $\pm$ 3.89 | 27.30 $\pm$ 2.77 | 33.58 $\pm$ 2.51 |
| 3H  | 27.21 $\pm$ 2.19 | 87.66 $\pm$ 3.27 | 44.50 $\pm$ 3.72 | 37.00 $\pm$ 2.27 |
| H   | 27.09 $\pm$ 1.89 | 88.43 $\pm$ 2.32 | 41.17 $\pm$ 1.67 | 37.00 $\pm$ 3.53 |
| 2S  | 14.59 $\pm$ 1.19 | 38.86 $\pm$ 1.87 | 20.76 $\pm$ 1.50 | 13.98 $\pm$ 2.13 |
| 4S  | 16.98 $\pm$ 2.00 | 39.54 $\pm$ 1.46 | 21.60 $\pm$ 2.20 | 14.19 $\pm$ 2.43 |
| S   | 15.66 $\pm$ 2.20 | 37.32 $\pm$ 2.66 | 21.75 $\pm$ 2.87 | 14.13 $\pm$ 3.00 |
